# Supplementary material for: Integrated Transcriptomic and Proteomic Analysis in the Roadmap of the Xylem Development Stage in Populus tomentosa
Source: Front Plant Sci. 2021 Nov 4;12:724559. doi: 10.3389/fpls.2021.724559 (PMC8600231; doi:10.3389/fpls.2021.724559)
Supplement: Supplementary file 7 [file Table_5.xls]

## Sheet: Supplement Table 5
Supplement Table 5. List of 72 differential expression proteins were potentially regulated by PTMs during xylem develpoment.
Protein IDs	Protein-log2（WT-2M/WT-1M）	Protein-Pvalue (WT-2M/WT-1M)	Protein-log2（WT-3M/WT-1M）	Protein-Pvalue (WT-3M/WT-1M)	gene IDs	Closest Arabidopsis homolog	Annotated function of the Arabidopsis homolog	Gene name	log2(WT-2M/WT-1M)	log2(WT-3M/WT-1M)	Number of PTM sites	Types of PTM	References
CL1190.Contig3_All	0.924138	0	1.26976	0.0452363	POPTR_0017s08610	AT4G13940	ATSAHH1	PtoSAHH.2	-0.311519	-1.4124	48	Phosphorylation;N-terminal Acetylation;N-glycosylation;N-terminus Proteolysis;S-nitrosylation;Lysine Ubiquitination;S-sulfenylation;Lysine Acetylation;Reversible Cysteine Oxidation;Methionine Oxidation	Wang et al., 2015
Unigene6233_All	-0.96688	0	-1.6698	0.0202191	POPTR_0009s12710	AT4G38970	AtFBA2		-1.43587	-0.507547	44	N-terminus Proteolysis;N-terminal Acetylation;Phosphorylation;Lysine Acetylation;S-nitrosylation;S-sulfenylation
CL22976.Contig7_All	-0.334908	0	1.06507	0.0447168	POPTR_0010s21350	AT3G12580	ATHSP70		0.936364	1.34032	41	Lysine Acetylation;Lysine 2-Hydroxyisobutyrylation;Phosphorylation;Carbonylation;Lysine Succinylation;Lysine Ubiquitination
CL22976.Contig10_All	-0.0962737	0	-1.31837	0.00639574	POPTR_0010s21280	AT5G02490	Hsp70-2		0.982032	1.40822	41	Lysine Acetylation;Lysine 2-Hydroxyisobutyrylation;Phosphorylation;Carbonylation;Lysine Succinylation;Lysine Ubiquitination
CL8841.Contig9_All	-0.302549	0	-1.55977	0.0105965	POPTR_0001s03410	AT3G12580	ATHSP70		1.60309	1.39787	37	Lysine 2-Hydroxyisobutyrylation;Lysine Acetylation;Carbonylation;Lysine Succinylation;Phosphorylation;Lysine Malonylation;Lysine Ubiquitination
CL16465.Contig4_All	-1.0161	0.0379753	-2.50722	0.00291917	POPTR_0001s08770	AT4G20360	ATRAB8D		-1.03341	-0.731942	37	Lysine Acetylation;N-terminus Proteolysis;S-sulfenylation;S-nitrosylation;Methionine Oxidation;N-terminal Acetylation;Phosphorylation;Lysine Ubiquitination
CL14783.Contig3_All	-0.823167	0	-2.09344	0.00198358	POPTR_0003s20870	AT3G13470	Cpn60beta2	PtoLEN1.1	-1.37119	-1.02531	35	Lysine Acetylation;Methionine Oxidation;Phosphorylation;Lysine Ubiquitination;S-nitrosylation;N-terminus Proteolysis;S-sulfenylation;N-terminal Acetylation;N-glycosylation
CL3767.Contig3_All	-0.759324	0	-1.71046	0.00185613	POPTR_0008s11190	AT2G04030	CR88		-2.06666	-1.77907	31	S-sulfenylation;N-terminus Proteolysis;Lysine Acetylation;Lysine Ubiquitination;S-nitrosylation;Phosphorylation
CL9862.Contig3_All	-0.640256	0	-1.08526	0.00152288	POPTR_0002s13700	AT3G60410	hypothetical protein (DUF1639)		0.780907	1.11509	27	Lysine Acetylation;Phosphorylation;Lysine Ubiquitination;Lysine SUMOylation;N-terminus Proteolysis;
CL2913.Contig2_All	1.0287	0	1.43128	0.00684807	POPTR_0014s07710	AT3G61260	Remorin family protein		1.44549	0.841847	21	N-terminal Acetylation;Phosphorylation;Lysine Acetylation;Lysine Ubiquitination;N-terminus Proteolysis	Wang et al., 2015
CL9289.Contig4_All	-0.318206	0	-1.15294	0.0339492	POPTR_0002s19000	AT4G01850	AtSAM2/MAT2	PtoMAT2	1.32572	0.293749	20	Phosphorylation;N-terminus Proteolysis;S-nitrosylation;Lysine Ubiquitination;S-sulfenylation;Lysine Acetylation;Reversible Cysteine Oxidation	Wang et al., 2015
CL22059.Contig1_All	0.852792	0	1.38348	0.00134309	POPTR_0013s02990	AT1G54690	HTA3		-1.12488	-2.24355	12	Phosphorylation;N-terminal Acetylation;N-terminus Proteolysis;Lysine Ubiquitination;Lysine Acetylation
CL17475.Contig1_All	-0.860594	0	-1.31396	0.042703	POPTR_0018s05360	AT3G14310	ATPME3		-1.08496	0.944346	12	N-terminus Proteolysis;S-nitrosylation;N-glycosylation;Lysine Acetylation
CL17475.Contig3_All	-1.04228	0.0273049	-1.46058	0.00749341	POPTR_0018s05360	AT3G14310	ATPME3		-1.08496	0.944346	12	N-terminus Proteolysis;S-nitrosylation;N-glycosylation;Lysine Acetylation
CL9960.Contig1_All	-0.960355	0	-1.22523	0.00798458	POPTR_0003s07040	AT1G53830	ATPME2	PtoPE3.4	-1.10013	-0.916859	12	N-terminus Proteolysis;N-glycosylation;S-nitrosylation;Lysine Acetylation
Unigene19330_All	-0.459647	0	-1.33055	0.00253067	POPTR_0016s14310	AT1G23740	AOR		-1.53948	-1.12756	12	N-terminus Proteolysis;Lysine Acetylation;N-terminal Acetylation;S-nitrosylation;Phosphorylation
CL5921.Contig2_All	1.5762		2.16052	0.0121595	POPTR_0012s00670	AT5G54160	ATOMT1	PtoOMT1.1	1.41527	0.344447	11	Phosphorylation;N-terminal Acetylation;N-glycosylation;N-terminus Proteolysis;S-nitrosylation;Lysine Acetylation;	Wang et al., 2015
CL15373.Contig3_All	0.50504	0	1.08415	0.0161734	POPTR_0015s10490	AT5G63400	ADK1		-0.569912	-1.37426	11	Lysine 2-Hydroxyisobutyrylation;Lysine Acetylation
CL1376.Contig4_All	-0.143056	0	-2.58334	0.00579336	POPTR_0007s07800	AT1G48920	ATNUC-L1		-1.29581	-0.693404	11	Phosphorylation	Wang et al., 2015
CL6765.Contig6_All	-0.963962	0	-1.15401	0.0103782	POPTR_0016s12370	AT5G01410	ATPDX1	PtoPDX1.2	-1.06256	-0.954373	11	N-terminal Acetylation;Phosphorylation;N-terminus Proteolysis;S-sulfenylation;Lysine Acetylation;Lysine Ubiquitination;Methionine Oxidation
Unigene31452_All	0.708201	0	1.1051	0.00107492	POPTR_0019s05050	AT5G18170	GDH1	PtoGDH1.1	1.72323	1.17474	10	N-terminal Acetylation;Phosphorylation;Lysine Acetylation;S-sulfenylation;Reversible Cysteine Oxidation;N-terminus Proteolysis
CL12609.Contig2_All	0.789343	0	1.68781	0.00769214	POPTR_0078s00220	AT3G56070	ROC2		-0.980693	-1.73073	10	N-terminus Proteolysis;N-terminal Acetylation;Reversible Cysteine Oxidation;S-sulfenylation;Lysine Ubiquitination;Lysine Acetylation
CL2608.Contig3_All	0.726924	0	1.40373	0.0266471	POPTR_0015s10630	AT1G30230	eEF-1Bb1	PtoEEF1.1	-0.634614	-1.01393	10	Phosphorylation;N-terminal Acetylation;N-terminus Proteolysis	Wang et al., 2015
Unigene12815_All	0.979346	0	1.35689	0.0349288	POPTR_0004s18730	AT1G76160	SKS5	PtoSKS5	-1.56984	-2.62459	10	Lysine Acetylation;N-terminus Proteolysis;Reversible Cysteine Oxidation;N-glycosylation
CL2043.Contig8_All	0.558987	0	2.04377	0.0260348	POPTR_0016s13260	AT5G01600	ATFER1		-1.03044	-3.08212	9	N-terminus Proteolysis;Lysine Acetylation;Phosphorylation
CL2043.Contig4_All	0.72104	0	2.044	0.0136228	POPTR_0016s13260	AT5G01600	ATFER1		-1.03044	-3.08212	9	N-terminus Proteolysis;Lysine Acetylation;Phosphorylation
CL2043.Contig5_All	1.19367	0	2.95889	0.0008106	POPTR_0016s13260	AT5G01600	ATFER1		-1.03044	-3.08212	9	N-terminus Proteolysis;Lysine Acetylation;Phosphorylation
CL2043.Contig17_All	1.09731	0	2.51289	0.0276142	POPTR_0006s10480	AT5G01600	ATFER1		-1.7498	-5.16537	9	N-terminus Proteolysis;Lysine Acetylation;Phosphorylation
CL3657.Contig3_All	-0.394411	0	-2.51606	0.0182226	POPTR_0006s05750	AT5G06860	ATPGIP1	PtoPGIP.4	-5.92831	-5.34103	9	N-terminus Proteolysis;N-glycosylation;Lysine Acetylation;Phosphorylation
CL5400.Contig1_All	1.92681	0.0397038	1.87149	0	POPTR_0004s24070	AT5G49760	Leucine-rich repeat protein kinase family protein		0.669619	1.41906	8	Phosphorylation
CL16005.Contig2_All	-0.186358	0	-2.32681	0.0488117	POPTR_0010s10600	AT1G24020	MLP423		-1.25982	-0.982079	8	Lysine Acetylation;Phosphorylation;N-terminus Proteolysis;N-terminal Acetylation
CL21.Contig14_All	1.31531	0	2.27432	0.00172989	POPTR_0016s02620	AT3G10740	ASD1	PtoASD1	1.09222	1.06116	7	N-glycosylation;N-terminus Proteolysis;Reversible Cysteine Oxidation
CL1850.Contig5_All	2.39717	0.0277833	2.56595	0.0204093	POPTR_0007s05650	AT4G39730	PLAT1		1.10466	0.48889	6	N-terminal Acetylation;N-terminus Proteolysis;Lysine Acetylation
Unigene9241_All	0.886367	0	1.14417	0.0157792	POPTR_0004s00900	AT1G11910	ATAPA1	PtoAPA1	1.37881	0.401425	6	Lysine Acetylation;N-terminus Proteolysis;Reversible Cysteine Oxidation
CL1850.Contig6_All	1.08027	0	1.19671	0.0323035	POPTR_0005s07860	AT4G39730	PLAT1		0.562995	-1.695	6	N-glycosylation;N-terminus Proteolysis;Lysine Acetylation;N-terminal Acetylation
CL84.Contig10_All	-1.91462	0.00581541	0.762441	0	POPTR_0014s01970	AT4G24220	VEP1	PtoVEP1	0.566053	1.06876	6	N-terminal Acetylation;N-terminus Proteolysis;S-nitrosylation;S-sulfenylation
CL4118.Contig3_All	-0.500642	0	-1.01717	0.03611	POPTR_0014s02630	AT5G67090	Subtilisin-like serine endopeptidase family protein	PtoAG12.2	1.00777	0.520473	6	N-glycosylation;N-terminus Proteolysis
CL20054.Contig1_All	-1.23027	0	-2.71083	0.026314	POPTR_0004s08500	AT2G38540	ATLTP1		-2.71757	0.760912	6	Lysine Acetylation;N-terminus Proteolysis;Reversible Cysteine Oxidation
Unigene9815_All	-1.26553	0.0487206	-1.70209	0.0143238	POPTR_0008s13030	AT1G14950	Polyketide cyclase/dehydrase and lipid transport superfamily protein	PtoMLP.2	-1.10859	0.608595	6	N-terminal Acetylation;N-terminus Proteolysis;S-nitrosylation;Methionine Oxidation
Unigene6416_All	1.19283	0.014192	2.00612	0.000385955	POPTR_0014s07060	AT1G01900	AtSBT1.1	PtoSBT1.1	1.87128	1.33026	5	N-glycosylation;N-terminus Proteolysis
CL91.Contig11_All	1.16441	0	1.40519	0.00144376	POPTR_0016s13930	AT2G14560	LURP1		1.78487	1.33235	5	N-terminal Acetylation;Phosphorylation;Lysine Acetylation
Unigene12676_All	1.27989	0	3.40449	0.00764711	POPTR_0009s14350	AT4G38400	ATEXLA2	PtoEXLA2	-2.08226	-1.65555	5	Reversible Cysteine Oxidation;N-glycosylation;N-terminus Proteolysis
CL4894.Contig4_All	1.15669	0.00640082	0.634044	0	POPTR_0017s12960	AT3G02110		PtoSCPL25	-0.497913	-1.54624	5	Lysine Acetylation;N-terminus Proteolysis;N-glycosylationn
CL11595.Contig4_All	3.9953	0	-1.49787	0.0370057	POPTR_0019s09300	AT1G03220	SAP2	PtoSAP2	-3.67495	-3.19458	5	N-glycosylation;N-terminus Proteolysis;Phosphorylation
Unigene32400_All	-1.14936	0.0274257	-1.36144	0.0128975	POPTR_0001s38900	At3g62730	Ferritin-like domain		-6.12285	0.0352447	5	N-glycosylation;Phosphorylation
Unigene9587_All	-1.35253	0	-3.3037	0.0416029	POPTR_0018s09710	AT2G18980	Peroxidase superfamily protein		-4.56421	-3.88199	5	N-terminus Proteolysis;Lysine Acetylation
CL17129.Contig3_All	1.70309	0.0094611	1.99976	0.0137983	POPTR_0002s03580	AT1G75280	NAD(P)-binding Rossmann-fold superfamily protein		2.16691	1.20692	4	N-terminal Acetylation;Phosphorylation;N-terminus Proteolysis
CL13628.Contig3_All	1.62986	0.00316708	1.66017	0.0141799	POPTR_0006s11040	AT5G01930	AtMAN6	PtoMAN6.1	1.64852	0.470967	4	N-glycosylation
CL17318.Contig1_All	1.5828	0.0246376	1.79601	0.00233849	POPTR_0002s25950	AT1G04040	HAD superfamily, subfamily IIIB acid phosphatase		-0.693652	-2.52003	4	N-terminus Proteolysis;N-glycosylation
CL201.Contig14_All	1.35831	0	1.44211	0.0436868	POPTR_0001s29670	AT4G14960	TUA6	PtoTUA2.1	-0.799271	-2.44071	4	Phosphorylation	Wang et al., 2015
Unigene13203_All	0.457923	0	-1.87587	0.00331878	POPTR_0003s21610	AT4G08780	Peroxidase superfamily protein		-5.45265	-3.97922	4	Lysine Acetylation;N-glycosylation;Phosphorylation
CL10490.Contig4_All	1.18125	0.016022	1.51339	0.000176305	POPTR_0014s10600	AT3G62020	GLP10	PtoGLP10.2	1.4731	0.248012	3	N-glycosylation;N-terminus Proteolysis;N-terminal Acetylation
CL10490.Contig7_All	0.759157	0	1.05447	0.0242366	POPTR_0014s10600	AT3G62020	GLP10	PtoGLP10.2	1.4731	0.248012	3	N-glycosylation;N-terminus Proteolysis;N-terminal Acetylation
Unigene4177_All	2.17824	0.0100116	2.41246	0.0228	POPTR_0007s11780	AT4G39230	response to cadmium ion		-8.14993	-6.13593	3	Lysine Acetylation;Phosphorylation
CL6144.Contig4_All	0.530833	0	1.86051	0.00481056	POPTR_0010s13740	AT1G68590	PSRP3/1		-0.94167	-1.8052	3	N-terminus Proteolysis;Lysine Acetylation;N-glycosylation
Unigene22653_All	1.43779	0.0218314	1.59285	0.0416904	POPTR_0009s00610	AT1G08480	SDH6		-3.39367	-1.53413	3	Lysine 2-Hydroxyisobutyrylation
CL15046.Contig1_All	0.203387	0	-1.51467	0.00984393	POPTR_0013s03900	AT3G04720	AtPR4	PtoPRP4.3	-2.22741	-2.75865	3	N-terminus Proteolysis
CL19100.Contig2_All	0.153979	0	-1.54636	0.00457742	POPTR_0018s13330	AT5G20500	cell redox homeostasis	PtocGrx_C4.1	-0.198658	-1.44543	3	Lysine Acetylation;Reversible Cysteine Oxidation
Unigene25675_All	-0.350789	0	-2.41438	0.00214877	POPTR_0009s04410	AT2G29500	HSP20-like chaperones superfamily protein		1.27354	1.46658	3	Phosphorylation
CL1360.Contig2_All	0.923656		1.68046	0.0418057	POPTR_0006s03180	AT2G40890	REF8	PtoC3H1	1.64335	0.762216	2	Lysine Ubiquitination
Unigene6447_All	0.906038	0	1.30832	0.000567222	POPTR_0002s03140	AT3G51030	ATTRX1	PtoTrxh1	1.04008	0.876062	2	N-terminal Acetylation;N-terminus Proteolysis
Unigene31187_All	0.905381	0	1.86978	0.00594971	POPTR_0005s04090	AT1G54780	AtTLP18.3		-0.840763	-1.71808	2	N-glycosylation
CL4804.Contig15_All	1.00872	0.0219306	1.17967	0.0228769	POPTR_0010s16070	AT3G17210	ATHS1		-0.246823	-2.02139	2	Phosphorylation;N-terminal Acetylation
CL7212.Contig1_All	1.56439	0.00565012	0.00304069	0	POPTR_0007s11600	AT5G66920	sks17		-0.511833	-2.01293	2	N-glycosylation
CL2803.Contig2_All	-1.44258	0.0483069	-1.67239	0	POPTR_0004s06630	AT1G73260	ATKTI1	PtoACTI.3	0.563549	2.11639	2	Lysine Acetylation
CL12472.Contig3_All	1.19636	0.0129821	1.24717	0.00295981	POPTR_0005s27730	AT1G20850	XCP2	PtoXCP2.1	1.33816	0.211554	1	N-terminus Proteolysis
CL3434.Contig6_All	2.69542	0	4.1985	0.00189001	POPTR_0007s10890	AT4G36945	PLC-like phosphodiesterases superfamily protein		0.715219	-1.6934	1	N-glycosylation
CL20579.Contig1_All	1.92839	0	3.92488	0.0370822	POPTR_0002s18880	AT2G47010	calcium/calcium/calmodulin-dependent Serine/Threonine-kinase		-1.19073	-1.54928	1	Reversible Cysteine Oxidation
CL1042.Contig1_All	0.419815	0	2.85234	0.000277861	POPTR_0004s05080	AT5G28010	Polyketide cyclase/dehydrase and lipid transport superfamily protein		-0.245615	-1.12612	1	Phosphorylation
Unigene18378_All	0.843719	0	1.32699	0.0105638	POPTR_0001s13140	AT2G33530	scpl46	PtoSCPL46	-0.905545	-1.8507	1	N-glycosylation
Unigene26696_All	1.195	0.012752	0.990209	0	POPTR_0013s00240	AT1G09560	germin-like protein 5	PtoGER1.2	-5.94095	-4.8526	1	Lysine 2-Hydroxyisobutyrylation
Unigene11945_All	-0.98581	0	-1.42757	0.00385241	POPTR_0013s03260	AT3G05060	NOP56-like pre RNA processing ribonucleoprotein		-1.27363	-0.911071	1	Phosphorylation
